# Supplementary material for: Structure- and Content-Dependent Efficiency of Cas9-Assisted DNA Cleavage in Genome-Editing Systems
Source: MDPI journal article supplement (doi:10.3390/ijms232213889), 2022-11-11
Supplement: s1 [file s1]

Supplementary

# Structure- and Content-Dependent Efficiency of Cas9-Assisted DNA Cleavage in Genome-Editing Systems

Svetlana V. Baranova <sup>1</sup>, Polina V. Zhdanova <sup>1</sup>, Alexander A. Lomzov <sup>1,2</sup>, Vladimir V. Koval <sup>1,2,\*</sup> and Alexander A. Chernonosov <sup>1</sup>

<sup>1</sup> Institute of Chemical Biology and Fundamental Medicine, Siberian Branch of Russian Academy of Sciences (ICBFM SB RAS), 630090 Novosibirsk, Russia

<sup>2</sup> Department of Natural Sciences, Novosibirsk State University, 630090 Novosibirsk, Russia

\* Correspondence: koval@niboch.nsc.ru

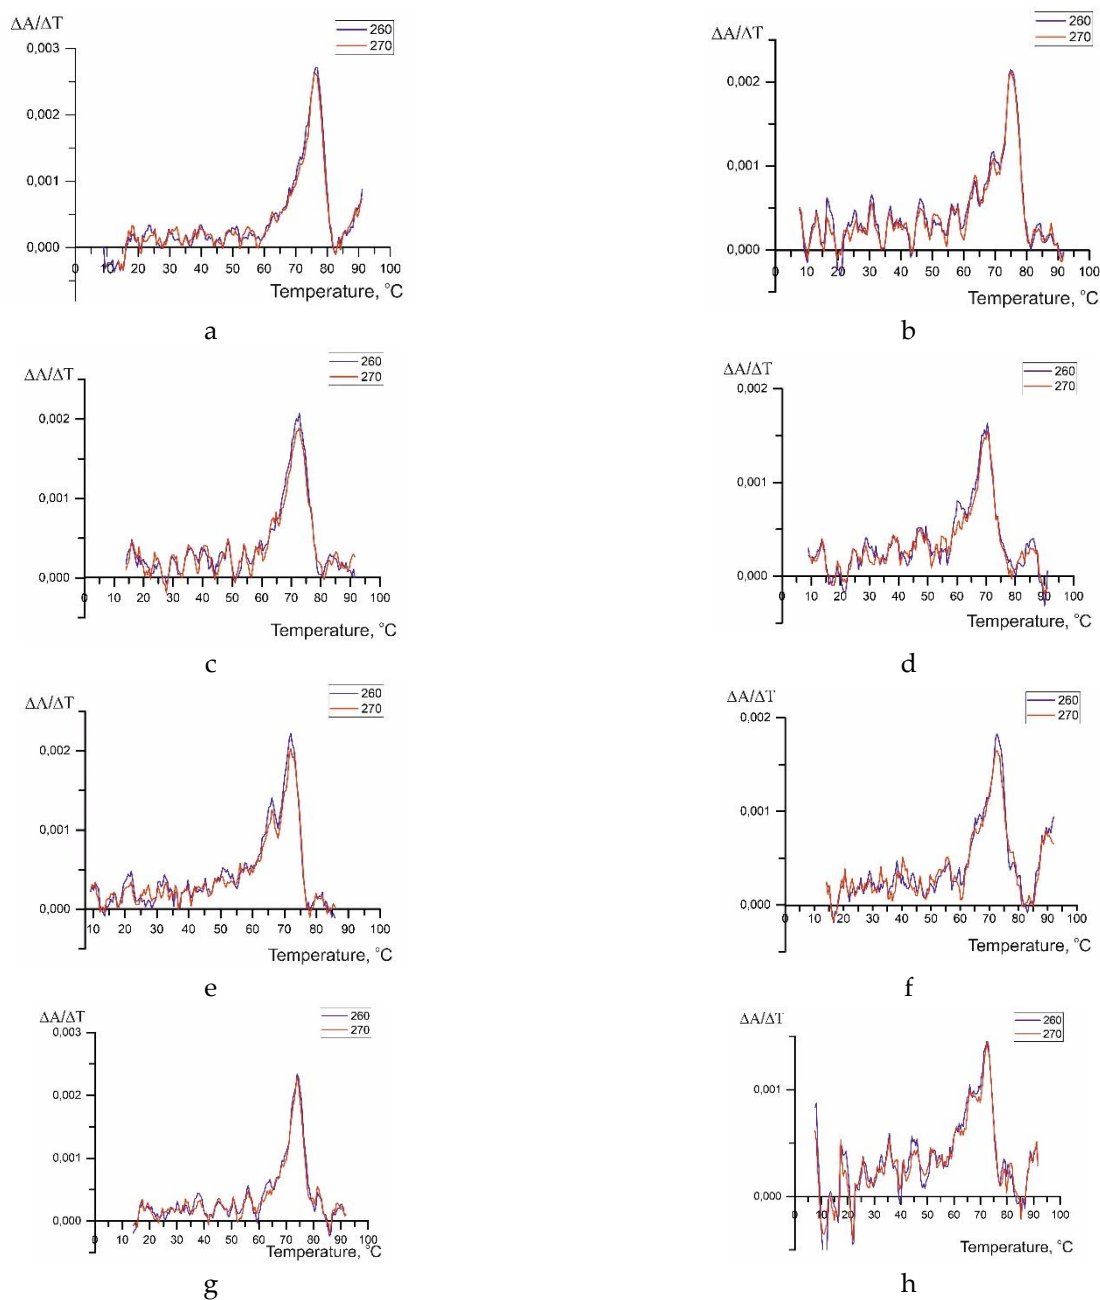

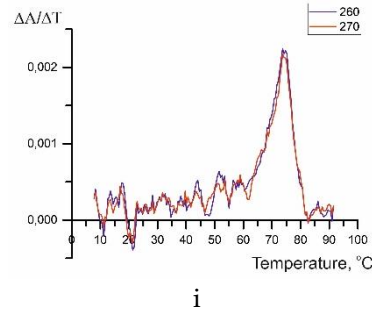

**Figure S1.** Typical melting curves of duplex recorded using different  $\lambda$  (UV) (260 nm and 270 nm): (a) S01, (b) S02, (c) S03, (d) S04, (e) S05, (f) S06, (g) S07, (h) S08, (i) S09.

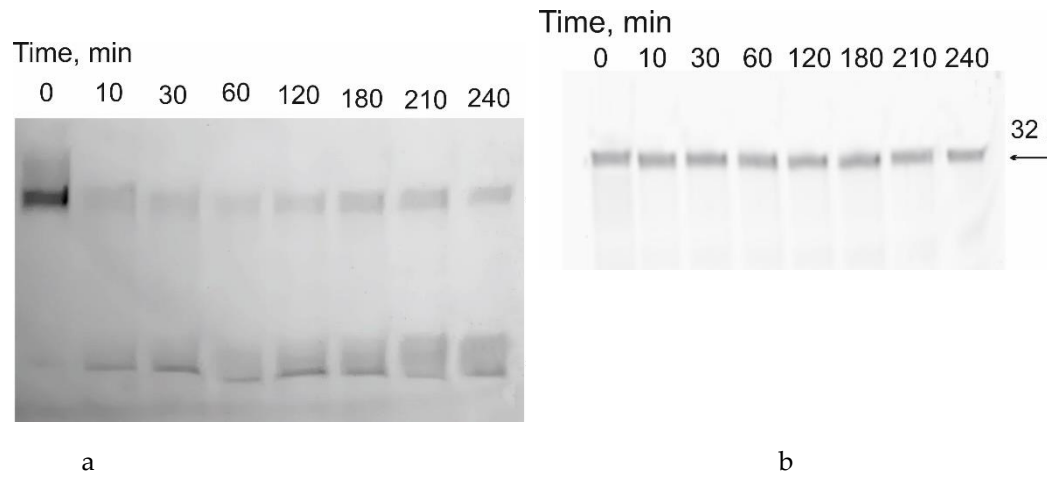

**Figure S2.** The cleavage assay of substrates S01 (a) and S03 (b) analyzed by denaturing 15% polyacrylamide gel electrophoresis. Cleavage was performed using  $\sim 3.8$  nM FAM-labeled dsDNA and 32 nM Cas9-sgRNA complex (ratio 1:8).

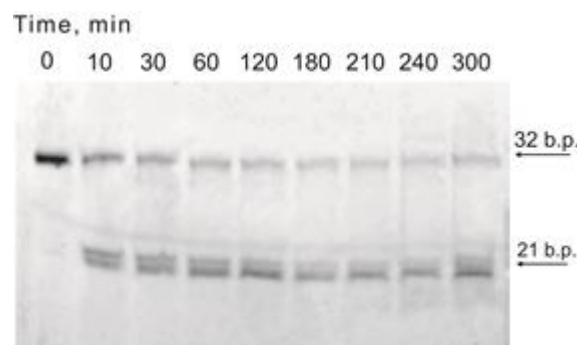

**Figure S3.** The cleavage assay of substrate S01 analyzed by denaturing 15% polyacrylamide gel electrophoresis. The cleavage was performed by means of  $\sim 3.8$  nM FAM-labeled dsDNA and 800 nM Cas9-sgRNA complex (ratio 1:210).
